# Supplementary material
Source: publisher figshare collection journal article supplement (https://sage.figshare.com/ndownloader/files/21001527)
Supplement: Supplementary file 1 [file 21001527]

## Appendix A

### Property of arcsin transformation

It is known<sup>1</sup> that for any numbers  $x$  and  $y$ ,

$$\arcsin(x) + \arcsin(y) = \arcsin\left(x\sqrt{1-y^2} + y\sqrt{1-x^2}\right).$$

Using this identity we have

$$\arcsin(\sqrt{y}) + \arcsin(\sqrt{1-y}) = \arcsin(\sqrt{y} \cdot \sqrt{y} + \sqrt{1-y} \cdot \sqrt{1-y}) = \arcsin(1) = \pi.$$

### References

1. Abramowitz M, Stegun IA, eds. *Handbook of Mathematical Functions with Formulas, Graphs, and Mathematical Tables*. New York: Dover Publications; 1972.
